# Supplementary material
Source: PubMed Central journal article supplement (PMC5332327)
Supplement: NIHMS849626-supplement-Supporting_Information.pdf [file NIHMS849626-supplement-Supporting_Information.pdf]

## ***Supporting Information***

# **Mechanism and Stereochemistry of Polyketide Chain Elongation and Methyl Group Epimerization in Polyether Biosynthesis**

*Xinqiang Xie,<sup>†</sup> Ashish Garg,<sup>†</sup> Chaitan Khosla,<sup>§</sup> and David E. Cane<sup>\*†</sup>*

<sup>†</sup>Department of Chemistry, Box H, Brown University, Providence, Rhode Island

02912-9108

<sup>§</sup>Departments of Chemical Engineering, Chemistry, and Biochemistry, Stanford

University, Stanford, California 94305

\*To whom correspondence should be addressed: [david\\_cane@brown.edu](mailto:david_cane@brown.edu)

## Table of Contents

|                                                                                                                             |       |
|-----------------------------------------------------------------------------------------------------------------------------|-------|
| <b>Figure S1.</b> Sequence alignment of NADPH-binding motifs                                                                | p S3  |
| <b>Figure S2.</b> KR <sup>0</sup> homology models                                                                           | p S4  |
| <b>Figure S3.</b> Domain boundaries of nanchangmycin synthase module 1                                                      | p S5  |
| <b>Figure S4.</b> Domain boundaries of salinomycin synthase module 7                                                        | p S6  |
| <b>Figure S5.</b> Synthetic gene for SalKR7 <sup>0</sup>                                                                    | p S7  |
| <b>Figure S6.</b> SDS-PAGE and LC-QTOF-MS analysis of recombinant Nan[KS1][AT1]                                             | p S8  |
| <b>Figure S7.</b> SDS-PAGE and LC-QTOF-MS analysis of recombinant holo-NanACP1                                              | p S9  |
| <b>Figure S8.</b> SDS-PAGE analysis of recombinant ketoreductases and mutants                                               | p S10 |
| <b>Figure S9.</b> Alignment of epimerase-active and epimerase-inactive KR domains                                           | p S10 |
| <b>Figure S10.</b> Ketoreductase activity of wild-type and mutant KR proteins                                               | p S11 |
| <b>Figure S11.</b> Chiral GC-MS analysis of reductions catalyzed by AmpKR2 and mutant                                       | p S12 |
| <b>Figure S12.</b> Chiral GC-MS analysis of reductions catalyzed by TylKR1 and mutant                                       | p S13 |
| <b>Figure S13.</b> Chiral GC-MS analysis of reductions catalyzed by EryKR6 and mutant                                       | p S14 |
| <b>Figure S14.</b> Chiral GC-MS analysis of coupled Nan[KS1][AT1] plus KR incubations                                       | p S15 |
| <b>Figure S15.</b> Kinetics of incubation of rec. KR domains with Ery[KS6][AT6] and<br>EryACP6 or Nan[KS1][AT1] and NanACP1 | p S16 |
| <b>Figure S16.</b> Fluorescence enhancement analysis of NADPH binding                                                       | p S17 |
| <b>Figure S17.</b> Absence of reductase activity of KR <sup>0</sup> domains                                                 | p S18 |
| <br>                                                                                                                        |       |
| <b>Table S1.</b> Rare Codons in Nan[KS1][AT1]                                                                               | p S19 |
| <b>Table S2.</b> Mutagenic Primers for Generation of KR Mutants                                                             | p S19 |
| <b>Table S3.</b> Mutagenic Primers for Generation of SalKR7 <sup>0</sup> Mutants                                            | p S19 |
| <b>Table S4.</b> Predicted MW and observed ESI-MS <i>M<sub>D</sub></i> of wt and mutant KR domains                          | p S20 |
| <b>Table S5.</b> Steady-state kinetic parameters for wild-type and mutant KR domains                                        | p S20 |
| <b>Table S6.</b> Stereospecificity of the reduction of <b>5</b> by wild-type and mutant KR domains                          | p S21 |
| <b>Table S7.</b> Kinetics of incubation of rec. KR domains with Ery[KS6][AT6] and<br>EryACP6 or Nan[KS1][AT1] and NanACP1   | p S21 |
| <b>Table S8.</b> Substrate binding affinity of wild type SalKR7 <sup>0</sup> and mutants                                    | p S22 |
| <b>Table S9.</b> Tandem EIX Assay of Redox-Inactive NanKR1 <sup>0</sup> and NanKR5 <sup>0</sup> Domains                     | p S22 |
| <b>Table S10.</b> Tandem EIX Assay of Redox-Inactive SalKR7 <sup>0</sup> and Mutant Domains                                 | p S22 |
| <b>Table S11.</b> Tandem EIX data analysis                                                                                  | p S23 |
| <br>                                                                                                                        |       |
| <b>Supplemental Reference</b>                                                                                               | p S23 |

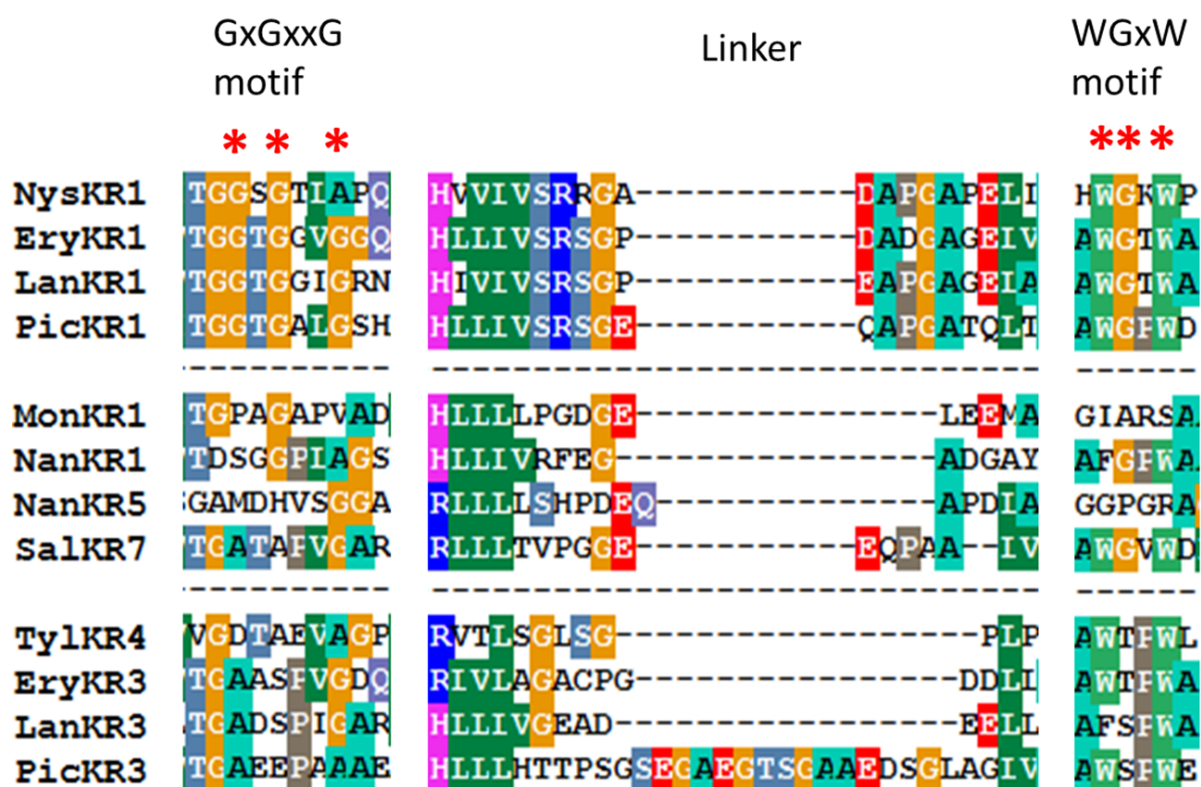

**Figure S1.** Mega3.0 (<http://www.megasoftware.net>) sequence alignment of NADPH binding site motifs, GxGxxG, WGxW, and the intervening linker region, for redox-active, epimerase-active KR domains (rows 1-4) and redox-inactive, epimerase-active KR<sup>0</sup> domains (rows 9-12) with presumptive redox-inactive, epimerase-active KR<sup>0</sup> domains from polyether synthases (rows 5-8). PKS source: Ery, erythromycin; Lan, lankamycin; Mon, monensin; Nan, nanchangmycin; Nys, nystatin; Pic, picromycin; Sal, salinomycin; Tyl, tylosin.

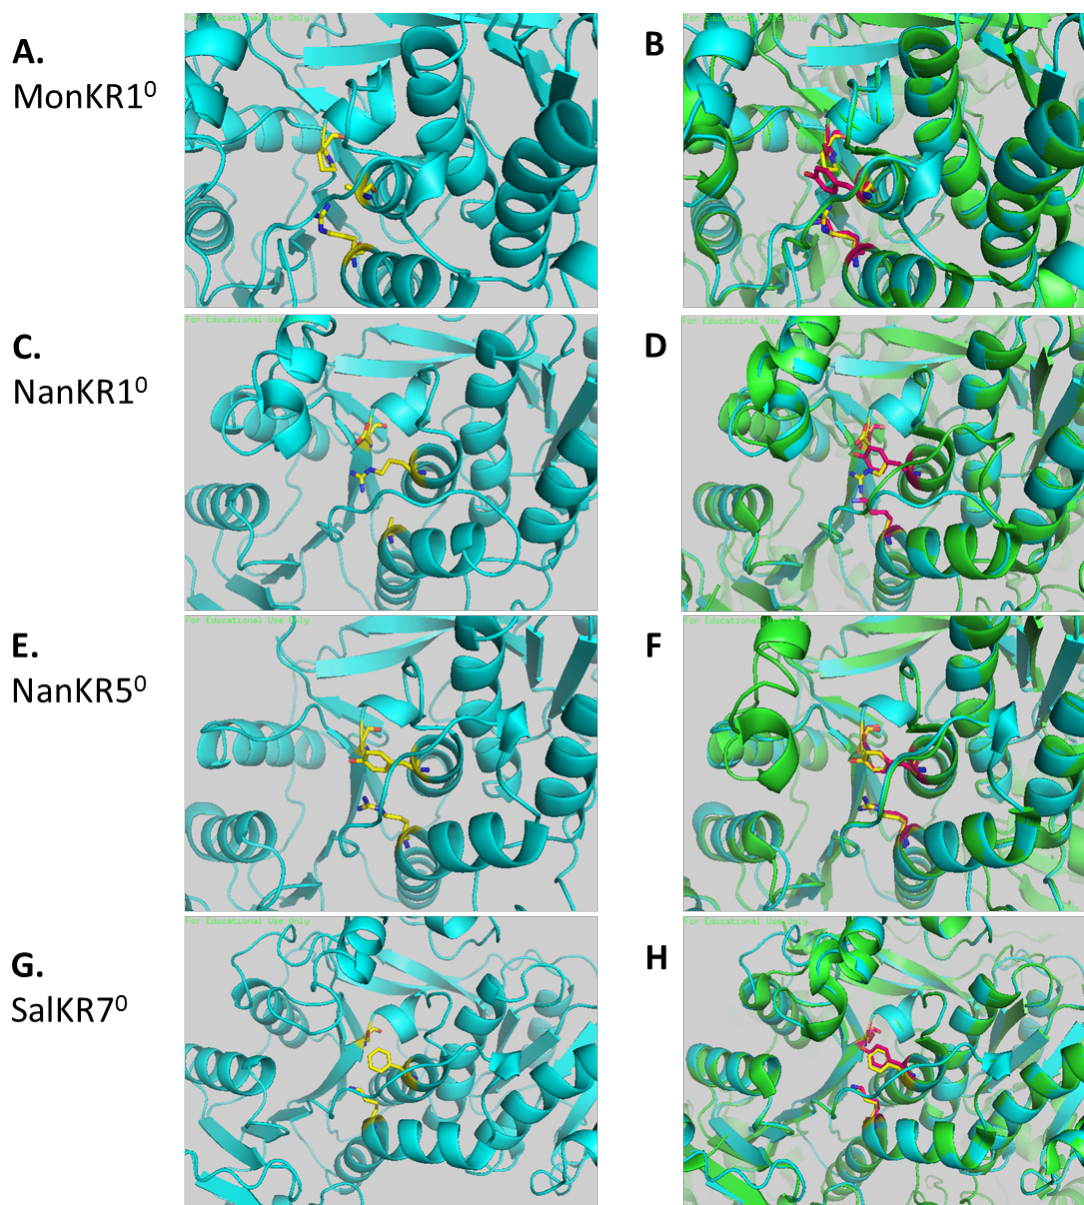

**Figure S2.** SWISS-MODEL<sup>1</sup> (<https://swissmodel.expasy.org/>) protein structure homology-models of KR<sup>0</sup> domains from polyether synthases, generated using the PicKR3 structure (PDB number: 3QP9) as template. A. Predicted active site of MonKR1<sup>0</sup> protein structure model based on PicKR3<sup>0</sup> structure; B. Protein structure overlap of MonKR1<sup>0</sup> with PicKR3<sup>0</sup>; C. Predicted active site of NanKR1<sup>0</sup> protein structure model based on PicKR3<sup>0</sup> structure; D. Protein structure overlap of NanKR1<sup>0</sup> with PicKR3<sup>0</sup>; E. Predicted active site of NanKR5<sup>0</sup> protein structure model based on PicKR3<sup>0</sup> structure; F. Protein structure overlap of NanKR5<sup>0</sup> with PicKR3<sup>0</sup>; G. Predicted active site of SalKR7<sup>0</sup> protein structure model based on PicKR3<sup>0</sup> structure; H. Protein structure overlap of SalKR7<sup>0</sup> with PicKR3<sup>0</sup>.

LOCUS AAP42855 2902 aa linear BCT  
23-MAY-2003

DEFINITION NanA1 [*Streptomyces nanchangensis*].

ACCESSION AAP42855

VERSION AAP42855.1 GI:31044143

DBSOURCE accession AF521085.1

1MRFRYGGVMAGSSPSHAQQATSPVAIVGLACRLPGAPDPEAFWRLLRAGENAVVPVPSR

(.....Nanchangmycin PKS loading module.....)

1021AAWLRAAHEGQPTAAPTAAATGPSMAEDPVAVVAVSCRYPGGVESGEALWRLVDEGVDAVG

1081EFPGRGRWDLAELFGRAPDGSGSATGRGGFLYAGDFDAEFFGISPREALAMPQQRIL

1141LELSWELLERAGIPPASLAGSATGVVYGATAVDYGPRLHEATAELDGHLLTGSTPSVASG

1201RVAYALGLEGPALTVDTACSSSLVAMHLAAQALRQGECDLALAGGVTVMATPGMFTSFSR

1261QRGLAPDGRCKPFAAADGTGWSEAGLVLLERLSDARRNGHQVLAVIRGSAVNQDGASN

1321GLSAPNGPSQQRVIRQALANARLEPADVDAVEAHGTGTTLGDPIEAQALLATYGGQRTDD

1381RPLWLGSIKSNIGHTQAAAGVAGVIKVMALRHGRLPASLHIDAPSPHIDWSDGTVRLLS

1441EPVDWPGTDWPGSDRPRRAAVSSFGISGTNAHLILEQAPDHPEPEPTTSGGVVPVLSAR Nan[KS1][AT1]

1501TADALRAQAGRLAEVWTAGAPRSPASPTSPASPADVWGSLATTRSADRHRRAVVSATDRDE

1561LLSGLRAVADGLAPAAVSAGAAPGPVMVFPQGSQWRGMGVELLDSSPVFAARMAACEAA

1621LGEFVDWSLTAVLRGAPGAPEPSRVDVLQPCWAVMVSLAAVWESYGVTPAVVGHSSQGE

1681IAAACVAGGLSLRDGARVVALRSQALRALAGHGTMASLALSGAEERFLADLGAAAARVT

1741VAVFNGPYSTVVSQPTDQVAAVVAACEAAGHRARTIDVDYASHGPQVDRDLADTIRTDLAD

1801LSPGASDAVFYSAVTGARQPTTELDADYWFNTLRQPVRFASIDALLAAGYRVFIEVSPH

1861PVLIPALRECFEEAEVAAATVPTLRRDQGGPDQVARALGDGFVAGLAVDWSRWFVGDGRE

1921AGDEGHRPRTVELPTYPFQRRRYWLAPDHGRREGRTAGVGRTPAGHALLSSAVELADGGL

1981VLSGRLPGDAAWVGAHTVAGVQLVPGAVLVDWALLAADEAGGASLEELLRAPLELSGPS

2041GLSEPSAGVLAQVAVGAPDESGRRELRISSRPADAGAGEGWTCHAVGSLAPGGPPAPADT

2101GTATVPWPPAGAEALDPAGLYERAERRGYGYGPALRGVVALWRDGADLVADVALPEEAGG NanDH1

2161GGEGGADGDGTAGFGLHPVLLDAALQPALAEPDGTGGEGAGPEARLWLPFAWSGVRLWA

2221TGARAARVRLSPLDGGGGDVADERELRIEVSPTGAPVLSVASVVLPRPTVRQVREASGA

2281AAGGLFALDWTVPVAPQEPGSAEDDAGCVAVLGEAPTEPGVDGCRDITYTDLALLAALDAG

2341APLPSVMMWRPPAADPGAAPEDAALSAVRGVAAALRAWVAEPRLTVSRLAVVTRGAVAAG

2401GAEGERPVDLAAAAWGCARGVQAEHPDRIVLVDVDDVDMGADTDTDIGAAAGLAAALGE

2461PQVALRGDTLLAPRLARSAATPGGVAFDPNGTVLVTDSGGPLAGSVAEHLVRAEGVRHLL NanKR1<sup>0</sup>

2521LVRFEGADGAYDITYDRQDAQVHMVTVDPDRDTAALERVVAQVDPAHPLTGVVHVAGLSADI

2581ETSGAARGWAVAAGVVRALHQATAALPSVRFVTLSDAATAWDGPAAPERAAAGAFCAAVT

2641DVRRRAGLHGLDVAFGPWAAADDDGGADSGGRWTGVLGADRGLALLRAACRDRPRLVAA

2701DIRTRALTAHPAHELPAALRTLGAASASAGGRAPVRRVAAAAPGRTDWDASRLVGLGPA

2761ERRRAVLELVRDHAAAVLQPPDKAVRADASFKELGFDVTAVELRDRLVAVGGLRLPAA

2821VFRHPTPEALAHRIEQQLAPDDTNNAAITDNADNAKSNNGSNGTALDAADKLASATAD NanACP1

2881EILDFIDNELGVLSEARPRPSN

**Figure S3.** Domain boundaries of nanchangmycin synthase module 1 and design of recombinant Nan[KS1][AT1], NanACP1 and NanKR1<sup>0</sup>

LOCUS CCD31893 1642 aa linear BCT  
 03-FEB-2012  
 DEFINITION type I modular polyketide synthase [*Streptomyces albus* subsp. *albus*].  
 ACCESSION CCD31893  
 VERSION CCD31893.1 GI:373248780  
 DBSOURCE embl accession HE586118.1

1 MDNEKLLDHLKQVTAELRQARQKLRREAEDEPEPIAIVSMACRYPGGVRSPEDLWQLVR  
 61 EGRDAITGFPTGRGWDLASLYDADPDRLGTSYVREGGFVHDAGDFDAEFFGISPREALAM  
 121 DPQQRLLLETSWEAFERAGVDPAAVAGSRTGVFVGTTYTGYGSDREGAEENVEGHLMTGI  
 181 ATAVASGRLSYTYGFEGPAVSLDTMCSSSLVALHLAVQALRQKECTLALAGGSQIMSTPD  
 241 VYVEFSRQRGLSPDGRCKPFAAAADGTGWSEGVVLLERLSDARRNGHRVLAVVIRGSAI  
 301 NQDGASNGLTAPNGPSQQRVIEQALANARLSPHQVDLIEAHGTGTTLGDPIDAEQALLATY  
 361 GGSRPEGRPLWLGSVKSNIGHAAAAAGVAGVIKAVMAVREGVLPKSLHIDAPTPEVDWSS  
 421 GAVALLTEEREWSVPGEPRTAAISSFGASGTNAHVLVQYAPEPDPEPAEAPAAVFTGA Sal [KS7] [AT7]  
 481 ALPWLLSGRTAEGLRQARSLSHTYASTTATALPGAALGLATTRAALERRGAVLTSGTPGT  
 541 PDKDALLTGLDALAEGTPAAGILEGTTVSGADRPVVFVPGQSQWAGMAVELLDSSSVFA  
 601 ARLGECAEALDPFVDWSLVLDVLRQTEGAPGFDRVDVVPALWAVMVS LAEVWRAAGVAPA  
 661 AVIGHSQGEIAAAAVSGALSLSDAAKVSALRARALLALAGKGMVSVADAADSVRERISA  
 721 WGERLALASVNGPQSTTVSGDPEALDELMAGCEAEVRRARRINVDYASHGPQVEKIRTEV  
 781 LGALSGIEPRTAEVFPFLSTVTGFEVVTGTELDAEYWYRNLNRNTVRFEDAVRQLLDRGHGAF  
 841 VEASAHVPLTVGVQETIDAAGAPAFVQGTLLREEDGDAARFLASLAEAWTRGVVNWAIVT  
 901 DSSAPPAEDLPTYAFQRRTYWLHGARTGSVQAPVDAVEAEFWDSVENGDIDSLSGSLALE  
 961 DSAPLAELLPALSSWRRRRRERGEVDSWRYRIDWQPLAESAPPALEGTWLLVTGDGVEAE  
 1021 ILKTGESALS AHGATVHPLTLTGEGEREALVRQLLGAEEHGPFGVLSLLATAEPERGP  
 1081 ATTLALVQALADA ECEAPLWVATRGAVGTGPEEAPAHPAQAGAWGLGLVAALERPGGWGG  
 1141 LVDLPAEPDENLAGRLAAALAGQEDQLALRATGTYYRRLARAPLPGSEVRPWEPADTVLV SalKR7<sup>0</sup>  
 1201 TGATAPVGARTALLLAASGAKRLLLVTPGGEEQPAALVGELEEAGVQVTLAEWDGRDVTA  
 1261 LRSLAEAAAADGAPVRGVFHAATRDLAPLDETTAADLAAATAAKTVPARALDEAFGEEV  
 1321 EAFVLFSSVTSYWGGEHAFAAASAELDALAARRRSRGLAATSVAWGVWDLFD AEQNP  
 1381 EAAELQARSADRGLPLLDPETAWQALRLSLGRQETAIAVADVDWERFWPLFTSARPAPLL  
 1441 SDLPEVRGLGRGLAEDTGTGADPGAAEALRSKLAGLSPAEQDRALD LVCAHAAAVLGH  
 1501 SAGAVDAERAFKDLGFDLSLTAVGLRNLGAATGLSLPATLVFDYPTPAAMAGYVRDHLLA SalACP7  
 1561 GARQEATAAGVQSGLDQLEADLLSVALDKDERKNLTRRLEGLLSRFKDAQAAADEESVSG  
 1621 KLDSASDEEIFAFIREEFGRPE

**Figure S4.** Domain boundaries of salinomycin synthase module 7 and design of recombinant SalKR7<sup>0</sup>

RGEVDSWRYRIDWQPLAESAPPALEGTWLLVTGDGVEAEIILKTGESALSAHGATVHPLTLTGEGEREALVRQLLGAEEVHGPFAGV  
LSLLATAEPERGPATTLALVQALADAECEAPLWVATRGAVGTGPEEAPAHPAQAGAWGLGLVAALERPGGWGLVDLPAEPDENLA  
GRLAAALAGQEDQLALRATGTYVRRRLARAPLPGSEVRPWEFADTVLVTGATAPVGARTALLLAASGAKRLLLTPVGGEEQPAALVG  
ELEEAGVQVTLAEWDGRDVTALRSLAEAAAADGAPVRGVFHAATRDLAPLDETTAADLAAATAAKTVPARALDEAFGEEVEAFVL  
FSSVTSYWGGGEHAAFAAASAELDALAARRRSRGLAATSVAWGVWDLFDAEQNPAAEAEHQARSADRGLPLLDPETAWQALRLSLG  
RQETAIAVADVVDWERFWPLFTSARPAPLLSDLPEVRGLGRGLAEDTGTGADPG

(N terminal *NdeI* site)

CATATGCGCGGTGAAGTGGATAGCTGGCGTTACCGTATTGACTGGCAACCGCTGGCGGAGAGCGCCCTCCAGCCTTGAAGGCAC  
GTGGCTGCTGGTCACCGCGATGGCGTCGAGGCTGAGATCCTGAAAACGGGCGAGAGCGCGCTGTGGCAGCATGGCGCGACGGTTC  
ACCCGCTGACCCTGACGGGTGAGGGTGAAGCTGAGGCACTGGTTCGCCAGCTGCTGGGTGCTGAAGTTGAACACGGCCCGTTTGGC  
GGCGTCTCTCTTTATTGGCGACCGCAGAGCCAGAGCGTGGTCCGGCGACGACGCTGGCACTGGTCCAAGCGCTGGCGGATGCGGA  
GTGGCAGCCCCGCTGTGGGTGCGGACCCGTGGTGCCTGGGCACCGTCCGGAAGAAGCGCCGGCGCATCCGGCGCAGGCTGGTG  
CGTGGGTCTGGGCTGGTTCGAGCGCTTGAACGCCCGGGTGGCTGGGTGGCCTGGTTCGATCTGCCGGCGGAACCGGACGAGAAC  
TTGGCGGGTTCGTCTGGCCGCGCGCTGGCCGGCCAGGAAGATCAGTTGGCGCTGCGTCCACCGGCACGTACGTTTCGAGACTGGC  
ACGGCACCGCTGCCGGGTTCGAAGTCCGTCCGTGGGAGCCTGCGGACACCGTTCTGGTACTGGTGGCAGCGCTCCGGTTGGTG  
CTCGTACGGCCCTGCTGCTGGCTGCGTCTGGCGCAAAGCGTTTGGTCTGACGGTTCCGGGTGGCGAGGAACAACCGGGCGCGCTG  
GTTGGTGAAGTGAAGAGGCCGGTGTGCAAGTGACCTTGGCCGAGTGGGACGGCCGTGACGTTACCGCGCTGCGTAGCCTGGCAGA  
GGCTGCCGCTGCGGACGGTGGCGCGGTCCGCGGTGTGTTTACGCGGGCAGCGGTGCCGATCTGGCCCCGCTGGACGAAACCACGG  
CAGCGGACCTGGCTGCAGCGACCGCAGCCAAGACCGTCCAGCGCGCGCTTAGATGAAGCATTTGGTGAAGGAGTTGAGGCATTC  
GTCTGTTTACGAGCGTTACCAGCTATTGGGGTGGCGGCGAGCACGCGCGCTTTCAGCCGCAAGCGCAGAGCTGGACGCGCTGGC  
AGCGCGTTCGTAGCCGTGGTTTGGCGGCAACCAGCGTAGCGTGGGGCGTCTGGGACCTGTTTCGACGCTGAGCAGAATCCGGCAG  
AGGCCGAGAACTGCAGGCGGTAGCGCTGACCGTGGTCTGCCGCTGCTGGATCCTGAAACCGCATGGCAGGCTTTGCGTCTGAGC  
CTGGGTGCCAAGAAACCGCGATCGCAGTTGCAGATGTGGATTGGGAACGCTTCTGGCCGTTGTTTACCCTCCGCACGCCCGGGCC  
ACTGCTGAGCGATCTGCCTGAAGTGGCGGGTCTGGGCCGTGGTCTGGCCGAGGATAACCGTACTGGTGGGATCCGGGTTAACTCG

AG

(**Stop codon** and C-terminal *XhoI* site)

**Figure S5.** *SalKR7<sup>0</sup>* amino acid sequence. The synthetic gene encoding *SalKR7<sup>0</sup>* domain was subcloned into the corresponding *NdeI* and *XhoI* digested pET-28a vector and the recombinant protein was expressed with N-terminal His6-tag in *E.coli* BL21 (DE3). Protein expression and purification procedures are described below.

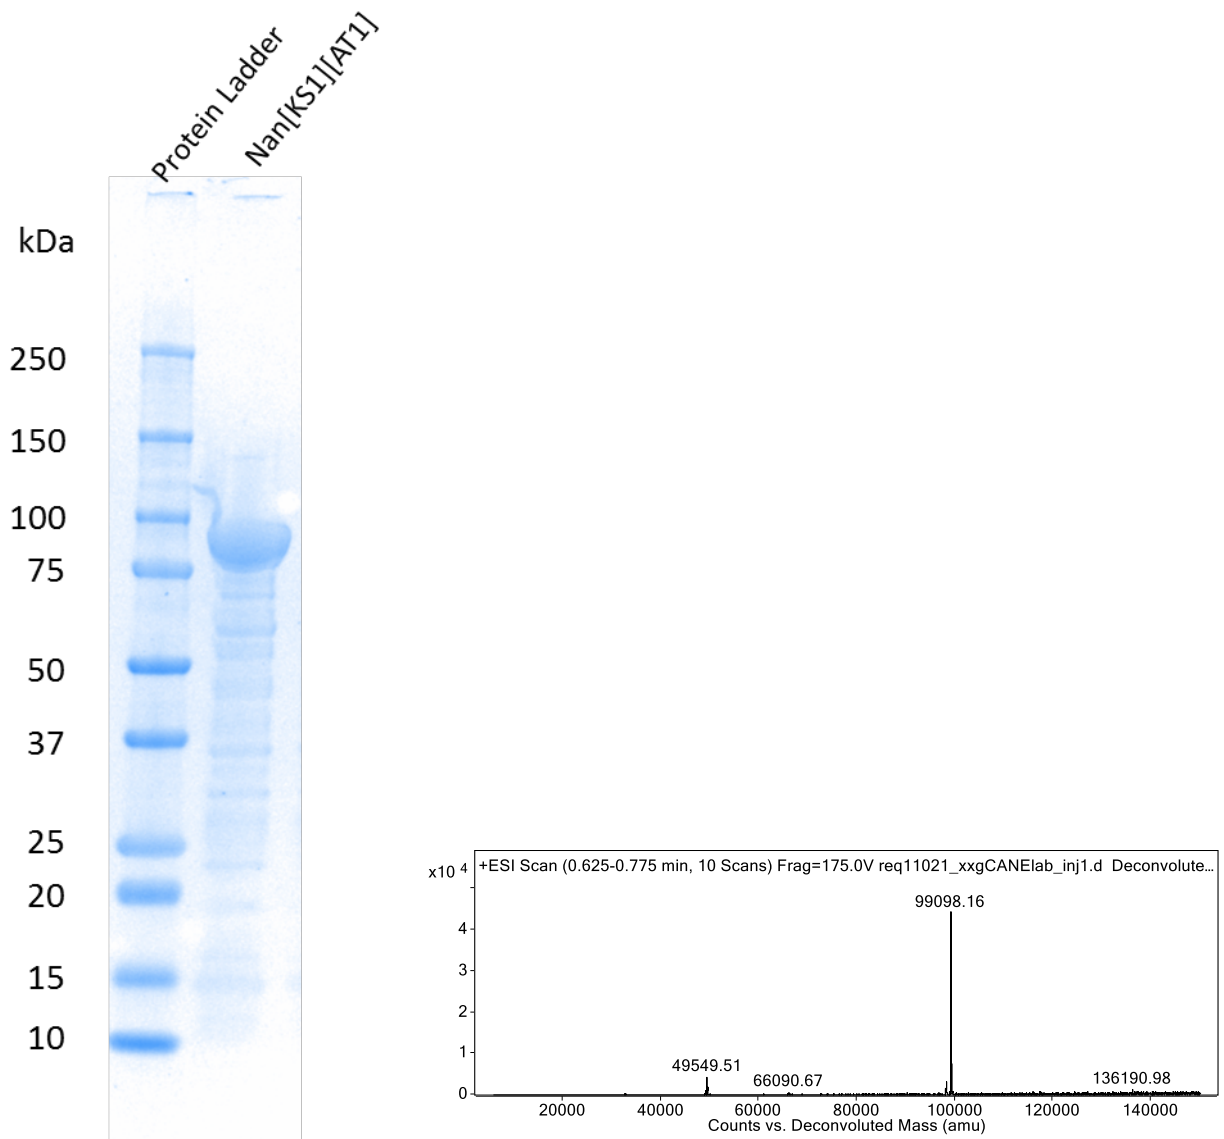

**Figure S6.** SDS-PAGE and LC-QTOF-MS analysis of recombinant Nan[KS1][AT1].



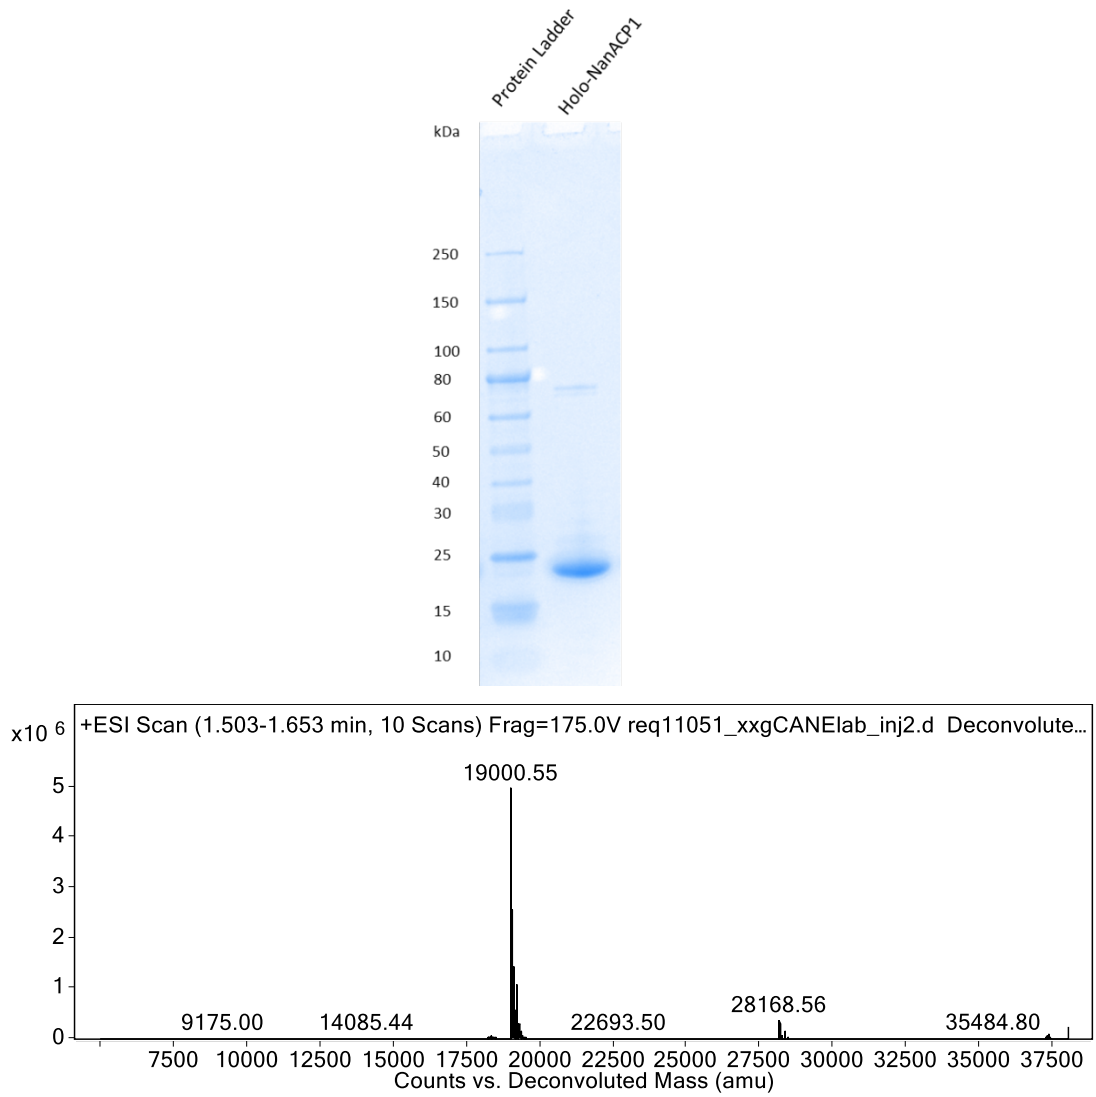

**Figure S7.** SDS-PAGE and LC-QTOF-MS analysis of recombinant holo-NanACP1.

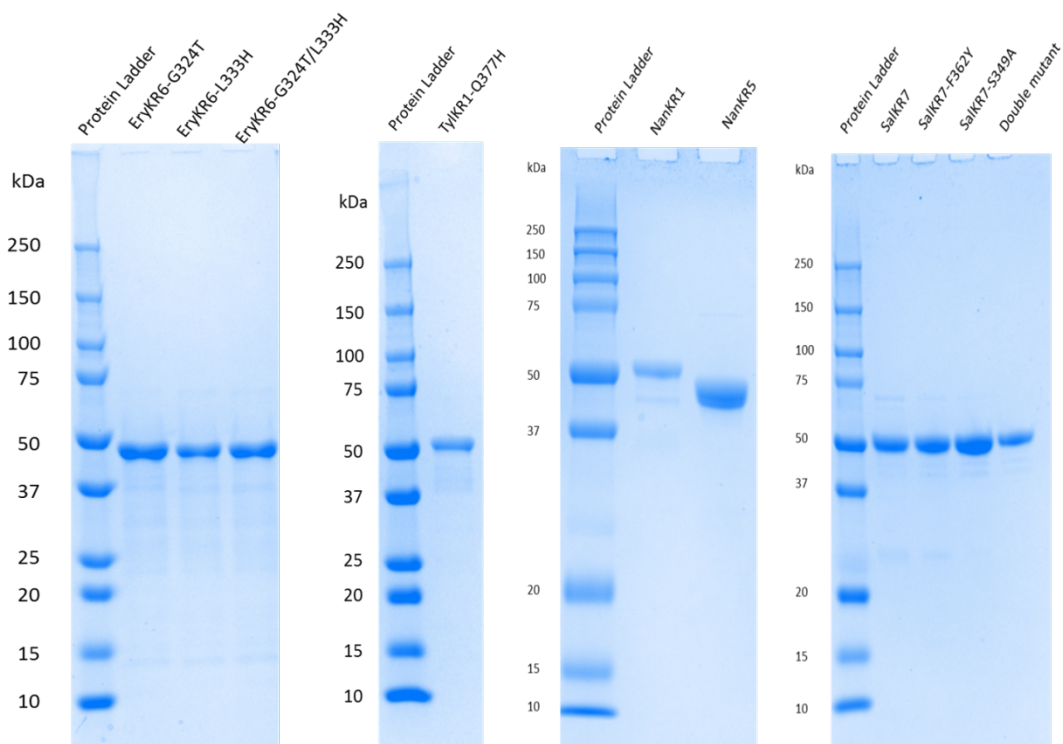

**Figure S8.** SDS-PAGE analysis of recombinant ketoreductases and mutants.

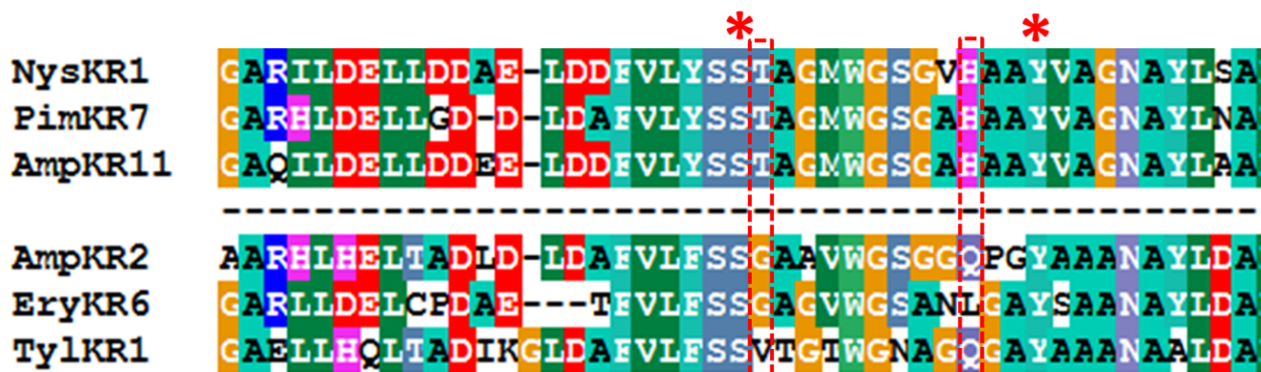

**Figure S9.** Alignment of epimerase-active KR domains (rows 1-3) with epimerase-inactive KR domains from polyketide synthases (rows 4-6). The conserved amino acids of Thr and His in epimerase-active KR domains are in broken red rectangles. (Pim, Pimaricin)

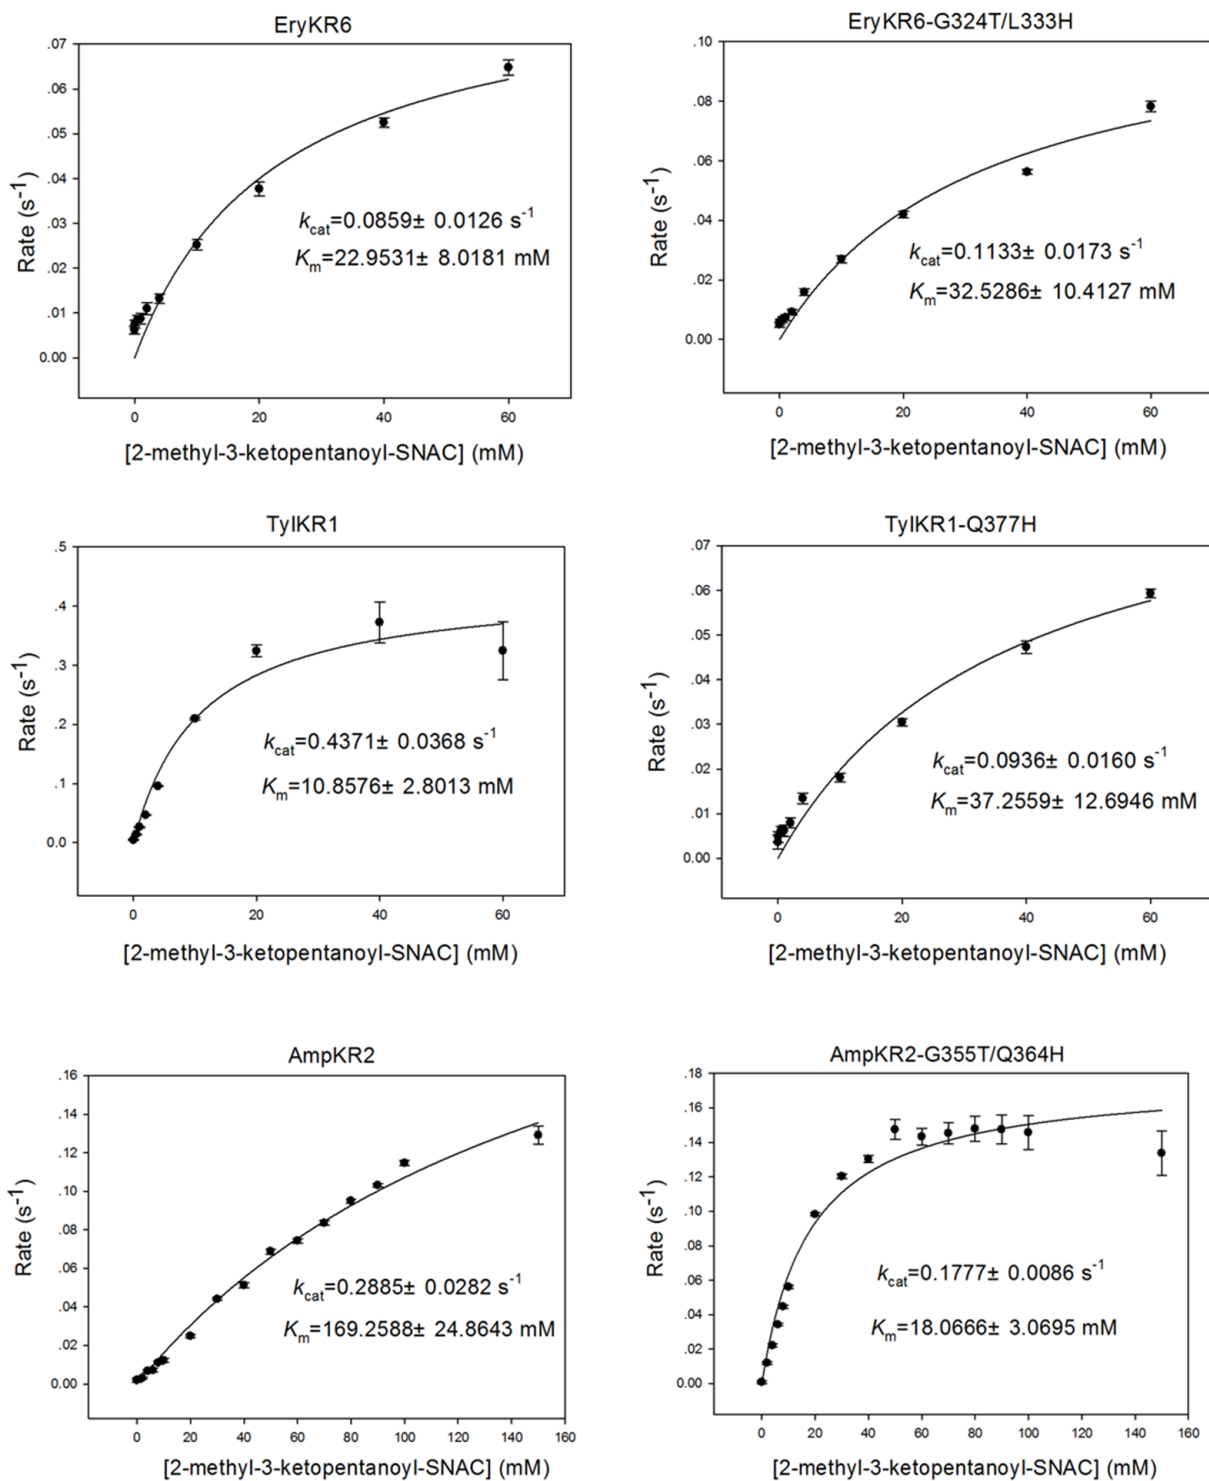

**Figure S10.** Ketoreductase activity of wild-type and mutant KR proteins for reduction of (±)-2-methyl-3-ketopentanoyl-SNAC (5). See Table S5 for summary of steady-state kinetic parameters.

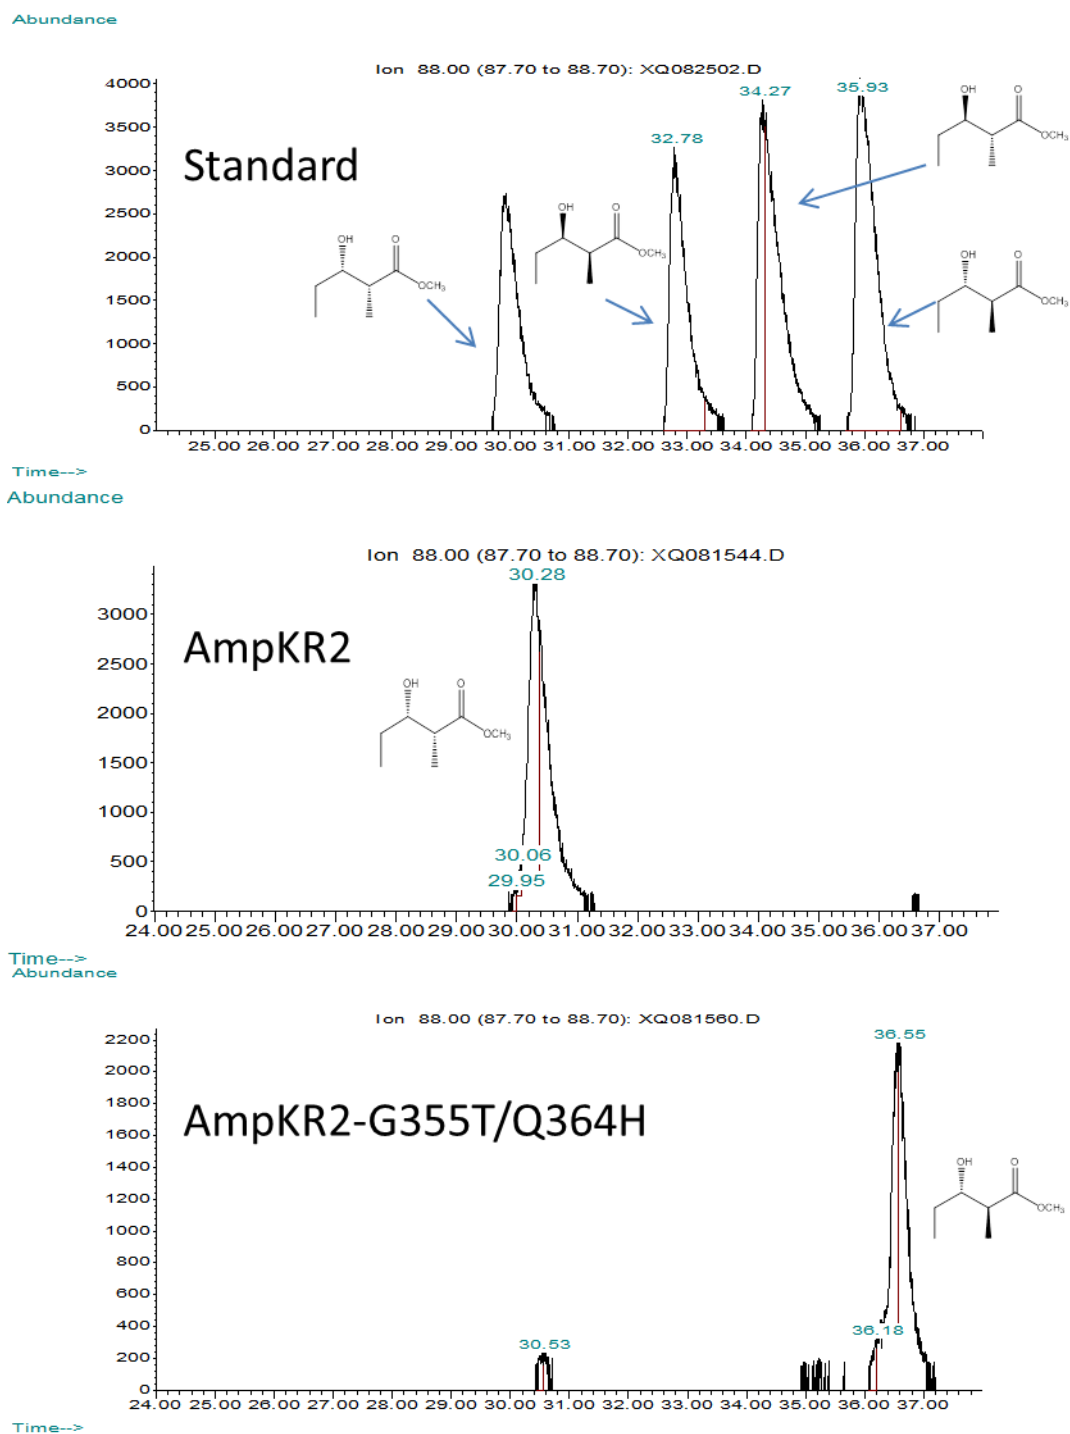

**Figure S11.** Chiral GC-MS analysis of the stereochemistry of diketide methyl esters derived from incubation of AmpKR2 and AmpKR2-G355T/Q364H with 2-methyl-3-ketopentanoyl-SNAC (**5**) and NADPH for 2 h at room temperature.

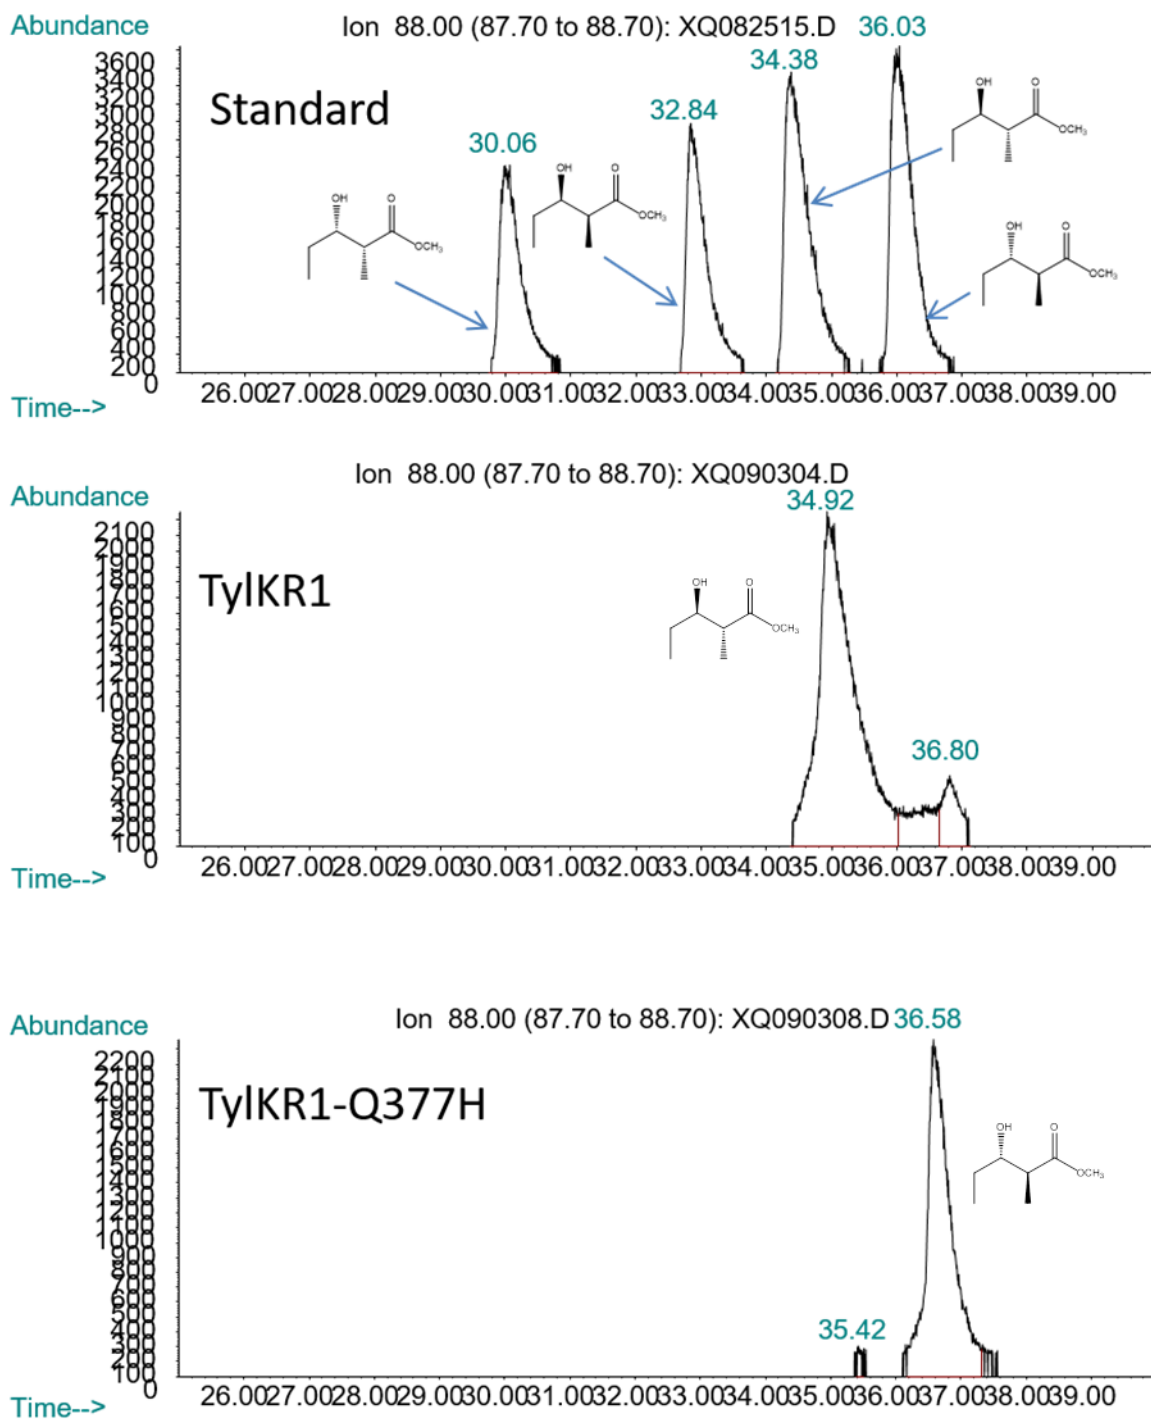

**Figure S12.** Chiral GC-MS analysis of the stereochemistry of diketide methyl esters derived from incubation of TyIKR1 and TyIKR1-Q377H with 2-methyl-3-ketopentanoyl-SNAC (**5**) as substrate and NADPH for 2 h at room temperature.

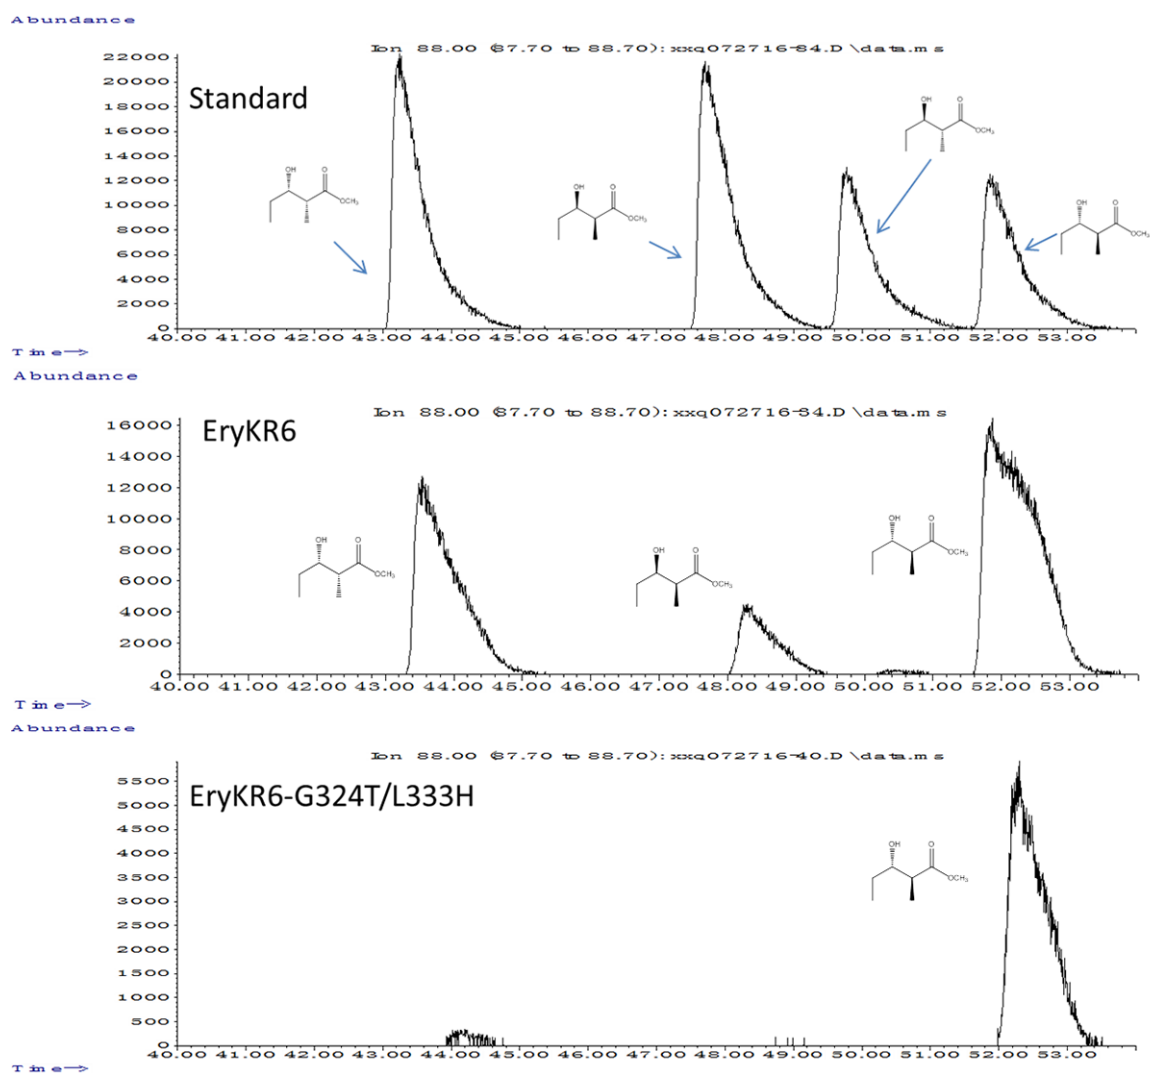

**Figure S13.** Chiral GC-MS analysis of the stereochemistry of diketide methyl esters derived from incubation of EryKR6 and EryKR6-G324T/L333H with 2-methyl-3-ketopentanoyl-SNAC (**5**) and NADPH for 2 h at room temperature.

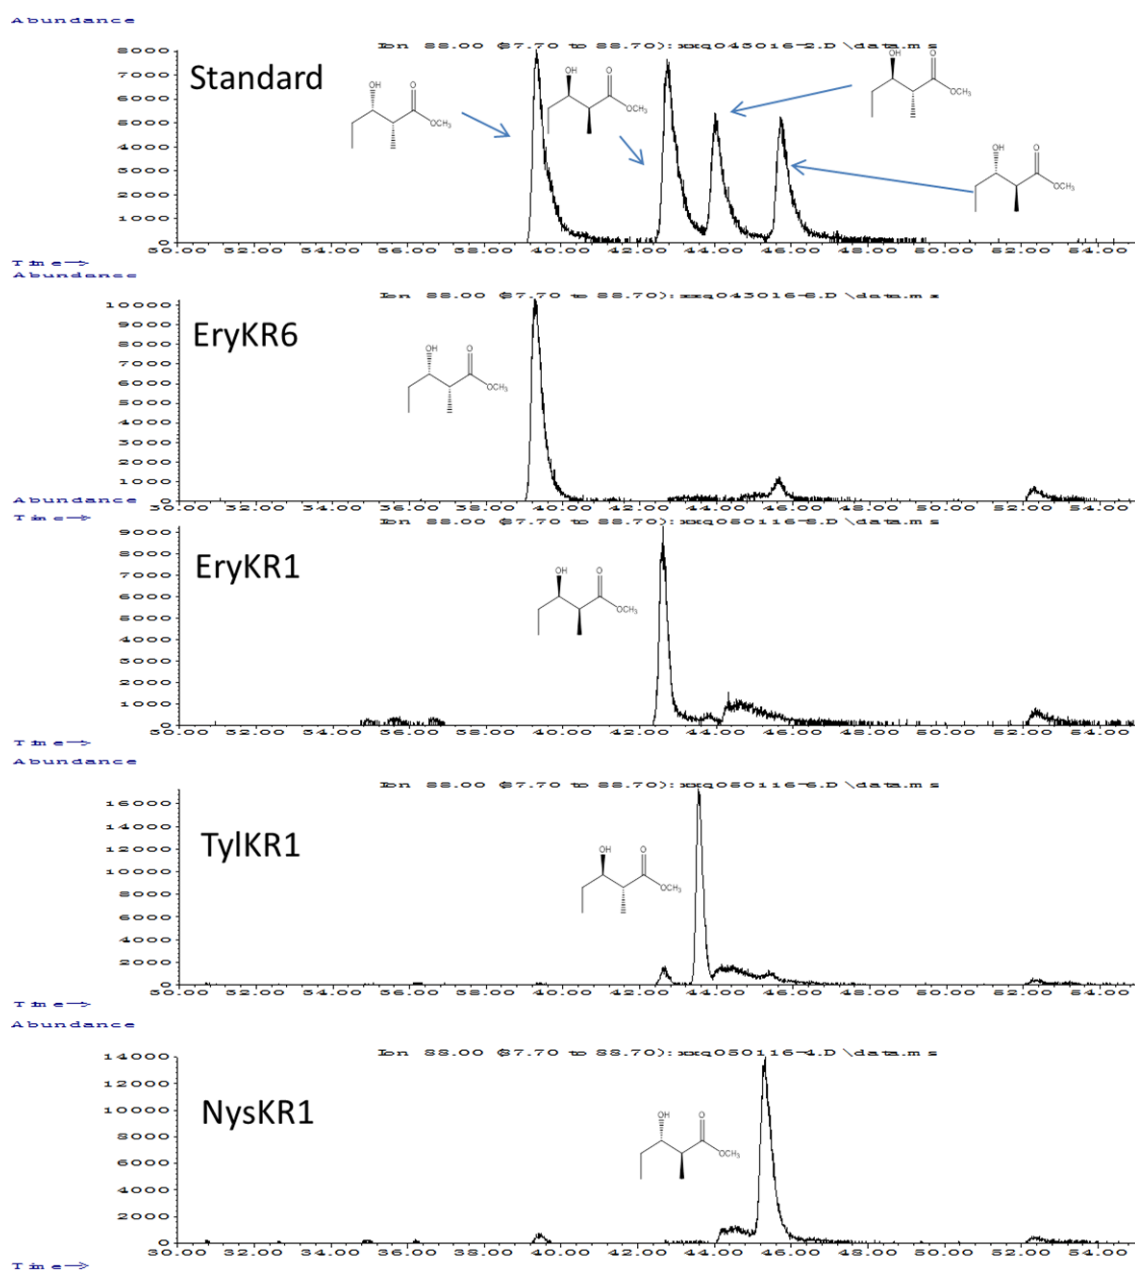

**Figure S14.** Chiral GC-MS analysis of methyl 2-methyl-3-hydroxypentanoates produced by KR-catalyzed reductions of 2-methyl-3-ketopentanoyl-NanACP1 (**7a**) generated *in situ* by incubation of Nan[KS1][AT1], propionyl-SNAC, *holo*-NanACP1, methylmalonyl-CoA and NADPH for 1 h.

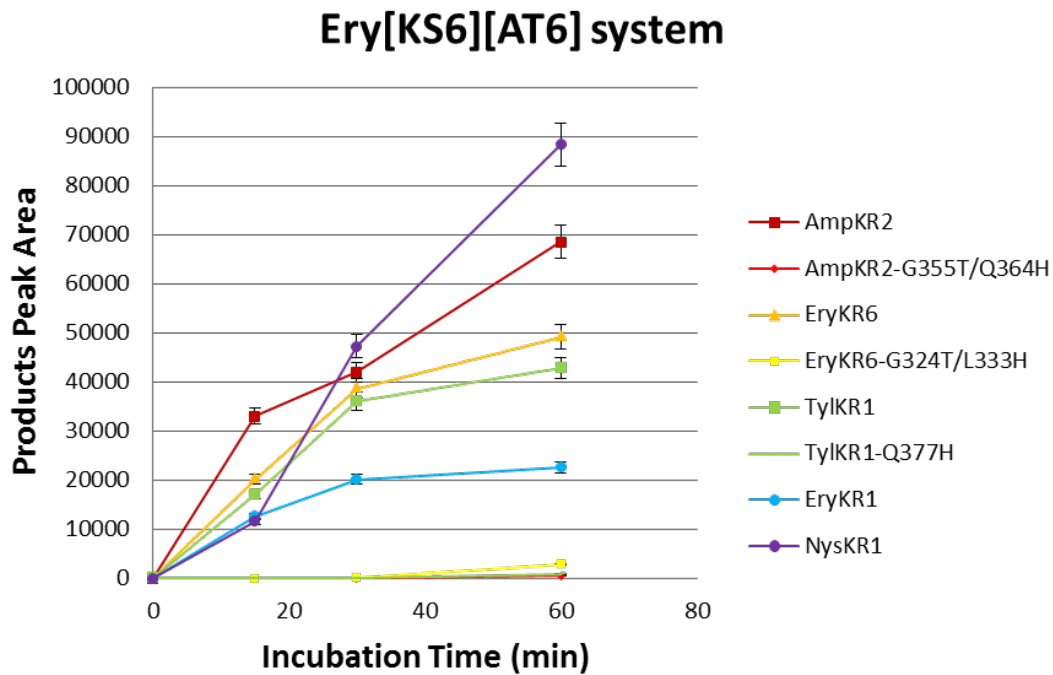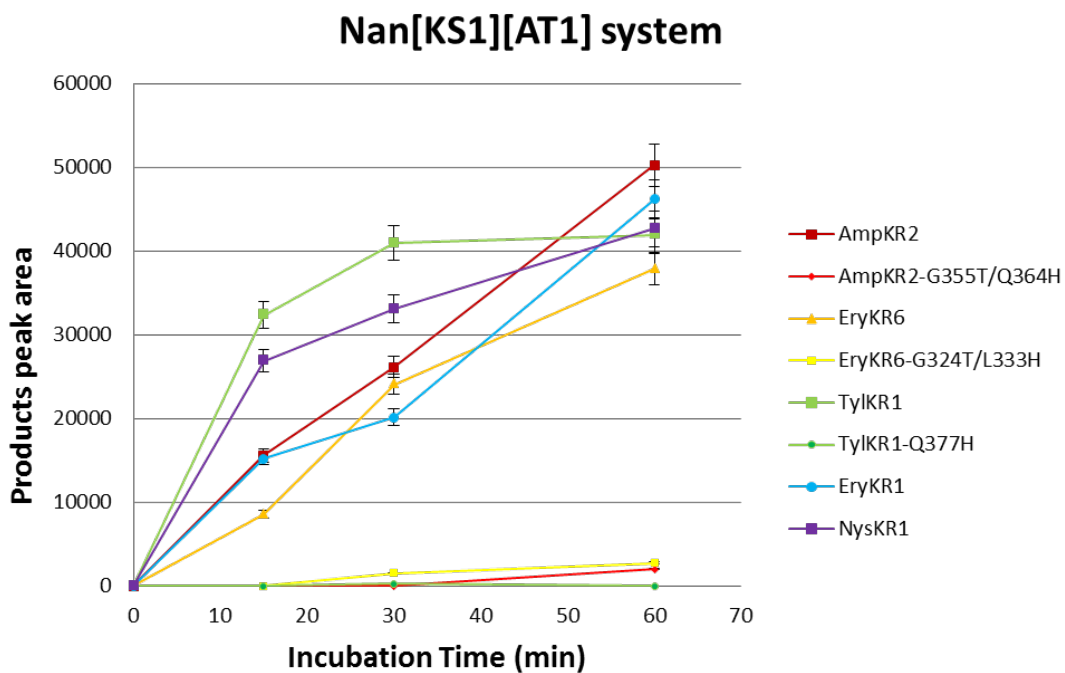

**Figure S15.** Kinetic analysis of recombinant KR domains incubated with reconstituted Ery[KS6][AT6] and EryACP6 or Nan[KS1][AT1] and NanACP1, based on GC-MS quantitation of derived diketide methyl esters. See Table S7 for summary of calculated rates of product formation for each KR domain.



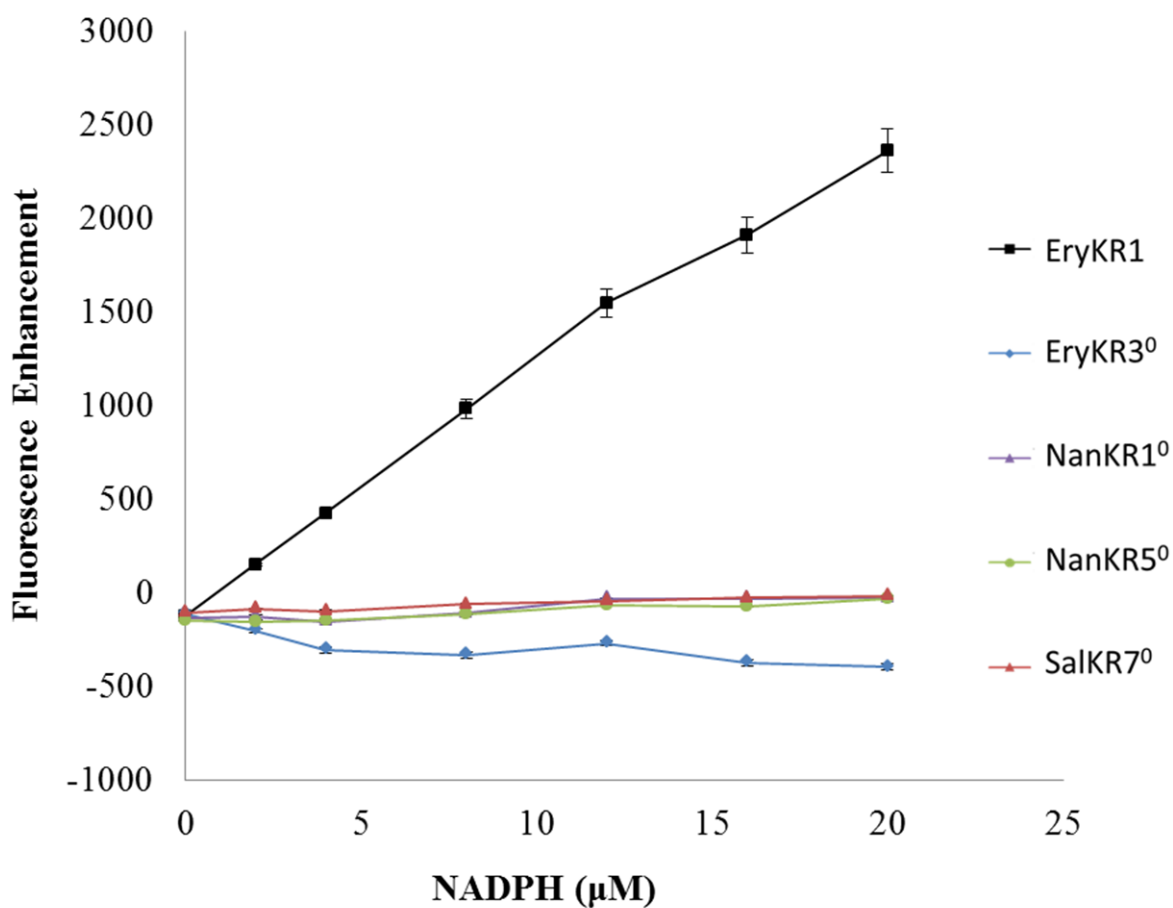

**Figure S16.** Fluorescence enhancement analysis of NADPH binding by NanKR1<sup>0</sup>. The ketoreductase-active EryKR1 was used as a control in these experiments. NanKR5<sup>0</sup> and SalKR7<sup>0</sup>. Proteins at 10  $\mu\text{M}$  were titrated with increasing concentrations of NADPH. Cofactor fluorescence enhancement was determined as described in the Methods section.

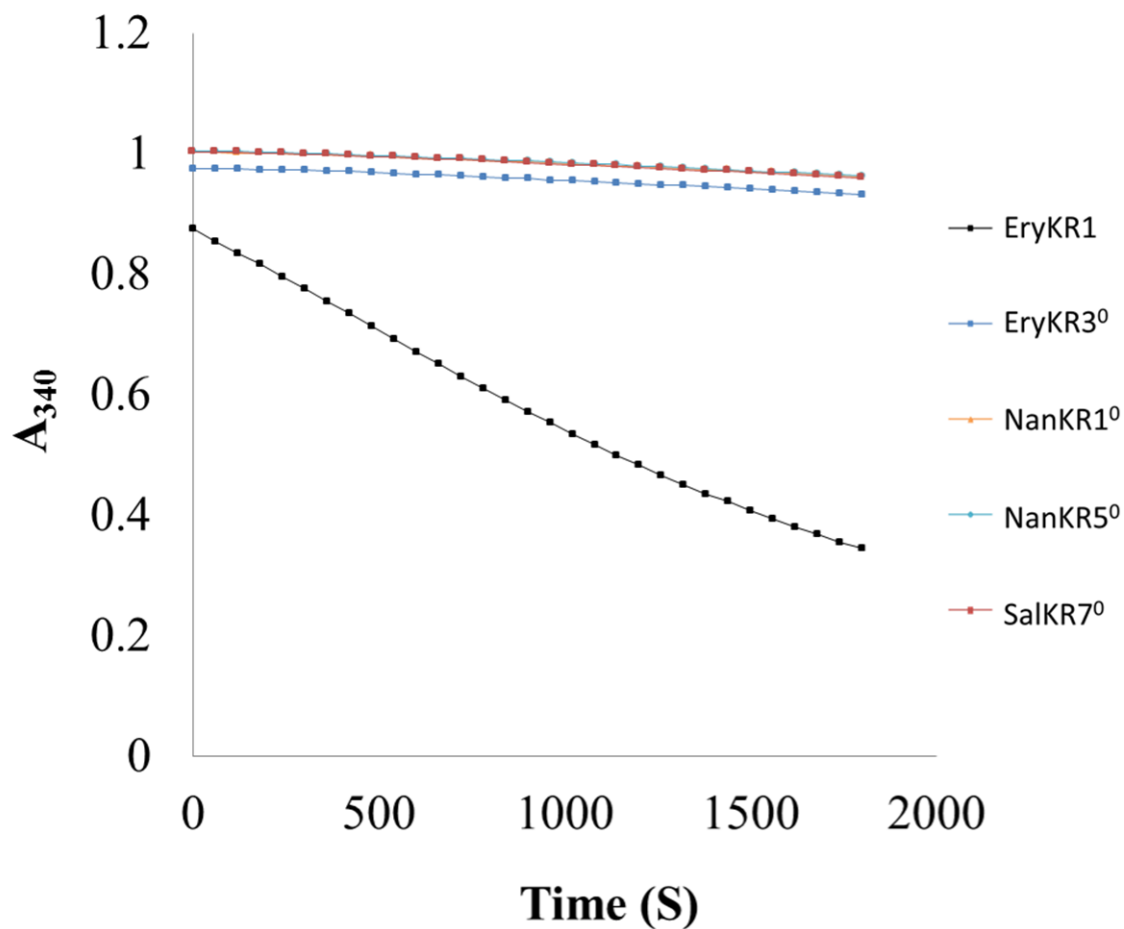

**Figure S17.** Absence of reductase activity of KR<sup>0</sup> domains. KR-catalyzed reduction of 8 mM ( $\pm$ )-2-methyl-3-ketopentanoyl-SNAC (**5**) by 5  $\mu$ M NanKR1<sup>0</sup>, NanKR5<sup>0</sup> and SalKR7<sup>0</sup>, with monitoring of the consumption of NADPH by the absorbance at 340 nm. The ketoreductase-active EryKR1 was used as a positive control in these experiments, with redox-inactive EryKR3<sup>0</sup> serving as the negative control.

**Table S1.** Rare Codons in Nan[KS1][AT1]

| Rare codons/total codons for one amino acid | Arg  | Leu  | Pro   |
|---------------------------------------------|------|------|-------|
| Nan[KS1][AT1]                               | 3/71 | 1/84 | 28/65 |

**Table S2.** Mutagenic Primers Utilized to Generate KR Mutants

| Mutation                  | F or R | Primer Sequence; 5'-3'                                         |
|---------------------------|--------|----------------------------------------------------------------|
| EryKR6<br>outside primers | F      | ATCGTAATCCATATGGCCGACAGCCGCTACCGCGTCGACTGGCGACCGC              |
|                           | R      | TGATTCGATGAATTCACGTCATCTCCCGCGCCGGGGCCGCCTGCACCGCGGGG          |
| EryKR6-G324T              | F      | CGCCGAGACCTTCGTCTCTGTTCTCGTCC <b>ACAG</b> CGGGGGTGTGGGGCAGTGCG |
|                           | R      | CGCACTGCCCCACACCCCCGCT <b>TGT</b> GGACGAGAACAGGACGAAGGTCTCGGCG |
| EryKR6-L333H              | F      | GCGGGGGTGTGGGGCAGTGCGAACC <b>CAC</b> GGCGCCTACTCCGCGGCCAACGCC  |
|                           | R      | GGCGTTGGCCGCGGAGTAGGCGCC <b>GTGG</b> TTCGCACTGCCCCACACCCCCGC   |
| TyIKR1<br>outside primers | F      | GCAGATATACATATGAGCCCCACCGATGCCTGGCGC                           |
|                           | R      | GTGGTGCTCGAGTCATCA <b>AGG</b> CTGCCGTCAGGGCCTCCCG              |
| TyIKR1-Q377H              | F      | CCGGCACATGGGGCAACGCCGGC <b>CAC</b> GGTGCCTACGCCGCCGCAACGCCG    |
|                           | R      | CGGCGTTGGCGGGCGGCGTACGCACC <b>GTGG</b> CCGGCGTTGCCCATGTGCCGG   |

F, forward primer; R, reverse primer. Bold letters represent the introduced mutant codons. restriction site underlined, stop codon colored.

**Table S3.** Mutagenic Primers for Generation of SalKR7<sup>0</sup> Mutants

| Mutation     | F or R | Primer Sequence; 5'-3'                           |
|--------------|--------|--------------------------------------------------|
| SalKR7-F362Y | F      | GGCGGCGAGCACGCGGCG <b>TAT</b> GCAGCCGCAAGCGC     |
|              | R      | GCGCTTGCGGCTGC <b>CATAC</b> GCCGCGTGCTCGCCGCC    |
| SalKR7-S349A | F      | GGCATTCGTCCTGTTCAGC <b>GCC</b> GTTACCAGCTATTGGGG |
|              | R      | CCCCAATAGCTGGTAAC <b>GGC</b> GCTGAACAGGACGAATGCC |

F, forward primer; R, reverse primer. Bold letters represent the introduced mutant codons.

**Table S4.** Predicted MW and observed ESI-MS  $M_D$  of recombinant KR domains and their mutants.

| Protein                           | MW (cal, Da) | LC-QTOF ( $M_D$ , Da) |
|-----------------------------------|--------------|-----------------------|
| EryKR6-G324T                      | 49299.66     | 49301.42              |
| EryKR6- L333H                     | 49298.64     | 49299.97              |
| EryKR6-G324T/L333H                | 49342.69     | 49344.25              |
| TyIKR1-Q377H                      | 53124.17     | 53125.92              |
| NanKR1 <sup>0</sup>               | 48632.58     | 48633.0               |
| NanKR5 <sup>0</sup>               | 47224.7      | 47225.7               |
| SalKR7 <sup>0</sup>               | 52102.3      | 52103.4               |
| SalKR7 <sup>0</sup> -F362Y        | 52118.3      | 52119.0               |
| SalKR7 <sup>0</sup> -S349A        | 52086.3      | 52087.4               |
| SalKR7 <sup>0</sup> -F362Y/ S349A | 52102.3      | 52103.39              |

**Table S5.** Steady-state kinetic parameters for reduction of (±)-2-methyl-3-ketopentanoyl-SNAC (**5**) by wild-type and mutant KR proteins. See Figure S10 for plots of  $V$  vs  $[S]$  for each KR domain.

| KR                 | $k_{cat}$ (s <sup>-1</sup> ) | $K_m$ (mM) | $k_{cat}/K_m$ (mM <sup>-1</sup> s <sup>-1</sup> ) |
|--------------------|------------------------------|------------|---------------------------------------------------|
| EryKR6             | 0.086±0.001                  | 23±8       | 0.0037                                            |
| EryKR6-G324T/L333H | 0.11±0.002                   | 32±10      | 0.0034                                            |
| TyIKR1             | 0.44±0.04                    | 10.9±2.8   | 0.040                                             |
| TyIKR1-Q377H       | 0.094±0.016                  | 37±13      | 0.0025                                            |
| AmpKR2             | 0.29±0.03                    | 169.0±25   | 0.0017                                            |
| AmpKR2-G355T/Q364H | 0.18±0.01                    | 18±3       | 0.0098                                            |

**Table S6.** Stereospecificity of the reduction of (±)-2-methyl-3-ketopentanoyl-SNAC (**5**) by wild-type and mutant ketoreductases and NADPH.

| protein            | diketide  |           |           |           |
|--------------------|-----------|-----------|-----------|-----------|
|                    | 2R,3S (%) | 2S,3R (%) | 2R,3R (%) | 2S,3S (%) |
| TyIKR1             | 0         | 0         | 91.3      | 8.7       |
| TyIKR1-Q377H       | 0         | 0         | 1.7       | 98.3      |
| AmpKR2             | 100       | 0         | 0         | 0         |
| AmpKR2-G355T/Q364H | 2.3       | 0         | 0         | 97.7      |
| EryKR6             | 35.2      | 12.2      | 0         | 52.6      |
| EryKR6-G324T       | 6.9       | 6.2       | 0         | 86.9      |
| EryKR6- L333H      | 25.9      | 0         | 0         | 74.1      |
| EryKR6-G324T/L333H | 0         | 0         | 0         | 100       |

**Table S7.** Kinetics of KR-catalyzed reduction of 2-methyl-3-ketopentanoyl-ACP generated *in situ* with Nan[KS1][AT1] plus NanACP1 or Ery[KS6][AT6] plus EryACP6. Relative values of  $k_{app}$ , derived from least-squares fits of GC-MS peak area of methyl 2-methyl-3-hydroxypentanoate to  $A_t = k_{app} \cdot t$  for wild-type and mutant KR domains. See Figure S15 for plots of GC-MS peak area vs. time for each KS/KR combination.

| Ery[KS6][AT6] system |                                                |                                | Nan[KS1][AT1] system |                                                |                                |
|----------------------|------------------------------------------------|--------------------------------|----------------------|------------------------------------------------|--------------------------------|
| KR                   | $k_{app}$<br>(peak<br>area·min <sup>-1</sup> ) | $k_{app-mut}/$<br>$k_{app-wt}$ | KR                   | $k_{app}$<br>(peak<br>area·min <sup>-1</sup> ) | $k_{app-mut}/$<br>$k_{app-wt}$ |
| AmpKR2               | 1070±200                                       |                                | AmpKR2               | 880±40                                         |                                |
| AmpKR2-G355T/Q364H   | 9.4±3.6                                        | 0.009                          | AmpKR2-G355T/Q364H   | 35±13                                          | 0.04                           |
| EryKR6               | 800±190                                        |                                | EryKR6               | 650±75                                         |                                |
| EryKR6-G324T/L333H   | 49±17                                          | 0.06                           | EryKR6-G324T/L333H   | 50±10                                          | 0.07                           |
| TyIKR1               | 700±190                                        |                                | TyIKR1               | 610±330                                        |                                |
| TyIKR1-Q377H         | 14±6                                           | 0.02                           | TyIKR1-Q377H         | 0.5±3                                          | 0.0007                         |
| EryKR1               | 355±125                                        |                                | EryKR1               | 745±70                                         |                                |
| NysKR1               | 1540±160                                       |                                | NysKR1               | 640±220                                        |                                |

**Table S8.** Binding affinity of wild type SalKR7<sup>0</sup> and mutants for (±)-2-methyl-3-ketopentanoyl-SNAC (**5**).

| Protein                           | $K_d$ (mM) | $K_d(\text{mut})/ K_d(\text{wt})$ |
|-----------------------------------|------------|-----------------------------------|
| SalKR7 <sup>0</sup>               | 1.2        |                                   |
| SalKR7 <sup>0</sup> -F362Y        | 1.8        | 1.5                               |
| SalKR7 <sup>0</sup> -S349A        | 1.2        | 1.0                               |
| SalKR7 <sup>0</sup> -F362Y/ S349A | 2.1        | 1.8                               |

**Table S9.** Tandem EIX Assay of Redox-Inactive NanKR1<sup>0</sup> and NanKR5<sup>0</sup> Domains.

| KR <sup>0</sup>      | time (min)                                                   |    |    |    |    |    |
|----------------------|--------------------------------------------------------------|----|----|----|----|----|
|                      | 0                                                            | 10 | 20 | 30 | 45 | 60 |
|                      | Deuterium exchange of [2- <sup>2</sup> H]-2 (%) <sup>a</sup> |    |    |    |    |    |
| EryKR6               | 0                                                            | 0  | 4  | 4  | 5  | 5  |
| NanKR1 <sup>0</sup>  | 0                                                            | 3  | 7  | 11 | 14 | 17 |
| Nan KR5 <sup>0</sup> | 0                                                            | 7  | 11 | 13 | 15 | 19 |

<sup>a</sup>Average of two or more measurements (±2%)

**Table S10.** Tandem EIX Assay of Redox-Inactive SalKR7<sup>0</sup> and Mutant Domains.

| KR <sup>0</sup>                  | time (min)                                                   |    |    |    |    |    |    |
|----------------------------------|--------------------------------------------------------------|----|----|----|----|----|----|
|                                  | 0                                                            | 10 | 20 | 30 | 40 | 50 | 60 |
|                                  | Deuterium exchange of [2- <sup>2</sup> H]-2 (%) <sup>a</sup> |    |    |    |    |    |    |
| EryKR6                           | 0                                                            | 0  | 4  | 4  | 5  | 7  | 7  |
| SalKR7 <sup>0</sup>              | 0                                                            | 4  | 9  | 20 | 24 | 26 | 29 |
| SalKR7 <sup>0</sup> -F362Y       | 0                                                            | 4  | 11 | 20 | 22 | 27 | 33 |
| SalKR7 <sup>0</sup> -S349A       | 0                                                            | 0  | 3  | 6  | 9  | 11 | 13 |
| SalKR7 <sup>0</sup> -S349A/F362Y | 0                                                            | 4  | 9  | 13 | 15 | 17 | 17 |

<sup>a</sup>Average of two or more measurements (±2%)

**Table S11.** Tandem EIX data analysis. Relative values of  $k_{app}$  were calculated from least-squares fits of isotope exchange data to  $\ln(A_t/A_0) = -k_{app} * t$  for wild-type and for mutant KR<sup>0</sup> domains, corrected for the rate of background exchange measured using EryKR6 alone (negative control).

| KR                               | $k_{app}$ (min <sup>-1</sup> ) | $k_{app}$ (min <sup>-1</sup> ) (corr) | $k_{rel}$ (%) |
|----------------------------------|--------------------------------|---------------------------------------|---------------|
| SalKR7 <sup>0</sup>              | 0.0062                         | 0.0049                                | 100           |
| SalKR7 <sup>0</sup> -F362Y       | 0.0067                         | 0.0054                                | 110           |
| SalKR7 <sup>0</sup> -S349A       | 0.0026                         | 0.0013                                | 26            |
| SalKR7 <sup>0</sup> -S349A/F362Y | 0.0033                         | 0.0020                                | 41            |
| EryKR6                           | 0.0013                         | 0                                     | 0             |

### Supplemental Reference.

- (1) Biasini, M.; Bienert, S.; Waterhouse, A.; Arnold, K.; Studer, G.; Schmidt, T.; Kiefer, F.; Cassarino, T. G.; Bertoni, M.; Bordoli, L.; Schwede, T. *Nucleic Acids Res* **2014**, *42*, W252-W258.
